1 **Multiple sources of Shh are critical for the generation and scaling of ventral spinal cord**  
2 **oligodendrocyte precursor populations**

3

4 **Running Title: Shh sources scale spinal OPC numbers**

5

6 **Lev Starikov<sup>1</sup>, Miruna Ghinia-Tegla<sup>2</sup>, and Andreas H. Kottmann<sup>1,3</sup>**

7

8 <sup>1</sup>City University of New York School of Medicine (CSOM), Dept. of Molecular, Cellular and  
9 Biomedical Sciences, New York City, NY 10031, USA

10 City University of New York Graduate Center, Molecular, Cellular, and Developmental Biology  
11 Subprogram, New York City, NY 10016, USA

12 <sup>2</sup>City College of New York, Dept. of Biology, New York City, NY 10031, USA

13

14 <sup>1</sup>corresponding author, [akottmann@med.cuny.edu](mailto:akottmann@med.cuny.edu)

15

16

17 **Key Words: sonic hedgehog, scale invariance, motor neurons, oligodendrocyte precursor, spinal**  
18 **cord**

19

20

21

22

23

24

25

26

27

28

29

30

31  
32  
33  
34  
35  
36  
37  
38  
39  
40  
41  
42  
43  
44  
45  
46  
47  
48  
49  
50  
51  
52  
53

***Abstract:***

**Graded Sonic Hedgehog (Shh) signaling emanating from notochord and floorplate patterns the early neural tube. Soon thereafter, Shh signaling strength within the ventricular zone becomes dis-contiguous and discontinuous along the ventral to dorsal axis suggesting a distribution of Shh that cannot be achieved by diffusion alone. Here we discover that sequential activation of Shh expression by ventricular zone derivatives is critical for counteracting a precocious exhaustion of the Olig2 precursor cell population of the pMN domain at the end of motor neuron genesis and during the subsequent phase of ventral oligodendrocyte precursor production. Selective expression of Shh by motor neurons of the lateral motor column at the beginning of oligodendrogenesis ensures a more yielding pMN domain at limb levels compared to thoracic levels. Thus, patterned expression of Shh by ventricular zone derivatives including earlier born neurons contributes to the scaling of the spinal cord along the anterior - posterior axis by regulating the activity of a select ventricular zone precursor domain at later stages of development.**

54

55 ***Introduction:***

56 The “Bauplan”, or body plan, of vertebrates can be recognized among members of the same  
57 species and across phyla despite significant differences in the absolute size of individuals of the  
58 same species or the form of different species. Chiefly responsible for our ability to recognize the  
59 common features of a body plan is the proportionate differentiation and growth of the constituent  
60 parts of an organism irrespective of absolute size. How developmental processes maintain a  
61 constant ratio of physical pattern features with changing size, a property known as scale  
62 invariance, is not completely understood (Huang and Umulis 2018).

63

64 Successful development is dependent on highly stereotyped series of inductive events that result  
65 in the determination of progressively increasing numbers of cell fates within rapidly growing  
66 tissues. Ensuring scale invariance could be achieved by mechanisms that are distinct from cell  
67 fate determination processes and could act at different developmental stages (Barkai and Ben-Zvi  
68 2009, Umulis and Othmer 2013). Alternatively, patterning mechanisms themselves could be  
69 modified to generate a size-invariant output (Kicheva and Briscoe 2015). Cell fate determination  
70 is governed by a handful of cell signaling factors termed morphogens that are secreted from  
71 spatial fix-points in the developing embryo and form gradients of activity across a developmental  
72 field (Lander 2007). Morphogen signaling induces distinct transcriptional programs in naïve  
73 precursor cells dependent on signaling thresholds that are determined by signal strength and  
74 duration (Kicheva, Bollenbach et al. 2014). Experimental and theoretical studies revealed several  
75 mechanisms by which morphogen signaling can be scaled to embryo size (Gregor, Bialek et al.  
76 2005, Houchmandzadeh, Wieschaus et al. 2005, Howard and ten Wolde 2005, McHale, Rappel

77 et al. 2006, Ben-Zvi and Barkai 2010, Cheung, Miles et al. 2014, Uygur, Young et al. 2016). The  
78 commonality of these studies is that they define mechanisms of scale invariance across embryos  
79 during early stages of development. However, scaling occurs within the same embryo and  
80 throughout development as different body parts reveal proportionate changes in size regardless  
81 of when they are specified during development. How is proportionality ensured across  
82 developmental stages within the same embryo?

83  
84 We have explored this question in the context of the switch from neurogenesis to gliogenesis in  
85 the developing neural tube. The spinal cord is a tube-like structure with enlargements at  
86 segmental levels that provide control of, and receive proprioceptive information from, limbs. The  
87 larger spinal cord at brachial (forelimb) and lumbar (hindlimb) levels compared to thoracic levels  
88 is chiefly the result of the presence of a greater number of motor neurons (MNs) that sub serve  
89 limb musculature, and correspondingly larger numbers of interneurons and glial cells (Bjugn and  
90 Gundersen 1993, Dasen 2017). Since the basic patterning and structure of the spinal cord is  
91 highly similar along the neuraxis, the difference in size between limb levels and thoracic  
92 segments allows comparative studies that might reveal mechanisms involved in scale invariance.  
93 MNs are among the very first neurons in the developing neural tube whose fate becomes  
94 specified while most interneurons and all types of glia develop later (Jessell 2000). Whether and  
95 how the earlier production of neurons plays a role in the proportionate differentiation of  
96 subsequent cell types is not well understood. MNs and oligodendrocyte precursor cells (OPCs)  
97 emerge subsequently from the same domain, the “pMN” domain, within the ventricular zone of  
98 the developing spinal tube (Bergles and Richardson 2015, Traiffort, Zakaria et al. 2016)  
99 suggesting that cell-autonomous as well as cell non-autonomous mechanisms could be involved

100 in the sequential and proportionate differentiation of MNs and OPCs (Traiffort, Zakaria et al.  
101 2016). The elucidation of the molecular control mechanisms that determine the precise “switch”  
102 from neurogenesis to gliogenesis of the pMN domain and the segment-specific yield of the pMN  
103 domain have been hampered by a scarcity of cell type selective- and temporally- specific genetic  
104 tools to dissect MN and OPC production within the pMN domain. Despite these difficulties,  
105 studies have implicated the morphogen Sonic Hedgehog (Shh) in regulating both, MN and OPC  
106 production (Briscoe and Ericson 1999, Traiffort, Zakaria et al. 2016).

107  
108 Shh plays a critical role in MN and OPC differentiation at several developmental stages. First,  
109 graded Shh signaling originating from the notochord induces distinct transcriptional programs in  
110 overlying naïve neural ectoderm cells in a concentration-dependent manner that leads to the  
111 establishment of molecularly distinct precursor domains along the ventral to dorsal axis of the  
112 developing neural tube (Dessaud, McMahon et al. 2008, Alaynick, Jessell et al. 2011, Yu,  
113 McGlynn et al. 2013),. The transcription factors activated by Shh are responsible for determining  
114 the cell fates in the derivatives of these precursor domains. Thus, Olig2 expression marks MN  
115 precursors, (pMN) (Mizuguchi, Sugimori et al. 2001, Novitch, Chen et al. 2001), Nkx2.2  
116 expression marks the more ventral V3 interneuron progenitors (p3), and Dbx1 is expressed in the  
117 p0 domain located at the equator of the neural tube leading to interneurons situated dorsal to  
118 MNs (Briscoe, Pierani et al. 2000). Subsequently, persistent Shh signaling originating from the  
119 medial floorplate (MFP) located at the ventral midline of the developing neural tube is critical  
120 for maintaining the identities of each of these domains throughout neurogenesis (Dessaud, Ribes  
121 et al. 2010). The ventral neural tube expands rapidly during neurogenesis and Shh signaling  
122 strength measured by expression levels of Shh target genes declines progressively within the

123 precursor domains (Balaskas, Ribeiro et al. 2012, Kicheva, Bollenbach et al. 2014). Surprisingly,  
124 the beginning of oligodendrogenesis is marked by increased Shh signaling strength within the  
125 pMN domain (Danesin, Agius et al. 2006). How this dynamic increase in Shh signaling is  
126 achieved subsequently to a decline in Shh signaling strength and whether it is of functional  
127 importance for OPC specification and production is an area of active research (Traiffort, Zakaria  
128 et al. 2016). Since the Shh gradient emanating from the MFP displays a constant decay length  
129 and does not scale with congruent and rapid growth during early development (Cohen, Kicheva  
130 et al. 2015), its influence on pMN domain activity must likely wane during neurogenesis.  
131 Accordingly, multiple adaptation mechanisms have been proposed to underlie temporally  
132 dynamic Shh signaling at the time of initiation of OPC production (Traiffort, Zakaria et al.  
133 2016). One such mechanism is the accumulative storage of Shh in the extracellular matrix  
134 followed by Sulfatase 1 dependent release leading to a greater concentration of Shh than could  
135 be achieved by continuous production and diffusion (Danesin, Agius et al. 2006, Touahri,  
136 Escalas et al. 2012, Al Oustah, Danesin et al. 2014). While the genetic ablation of Sulfatase 1  
137 curtails the production of OPCs, the current experiments cannot exclude the possibility that other  
138 signaling factors than Shh are released from the extracellular matrix by Sulfatase 1 and then  
139 participate in the regulation of OPC production. Another mechanism might be the sequential  
140 production of Shh by previously specified ventricular zone derivatives (VZD). Prominent  
141 sources of VZD<sub>Shh</sub> are the lateral floorplate (LFP<sub>Shh</sub>) (Charrier, Lapointe et al. 2002, Park, Shin et  
142 al. 2004, Al Oustah, Danesin et al. 2014), which is constituted by cells emigrating from the p3  
143 domain, and MNs (MN<sub>Shh</sub>) (Oppenheim, Homma et al. 1999, Akazawa, Tsuzuki et al. 2004). The  
144 selective ablation of Shh from LFP or MNs without impacting earlier patterning of the spinal

145 cord has not been achieved and causal evidence for the involvement of LFP<sub>Shh</sub> and MN<sub>Shh</sub> in the  
146 regulation of OPC generation is therefore lacking.  
147 Here we produced a series of mouse lines with different degrees and tissue selectivity of  
148 conditional Shh gene ablation from the MFP, LFP, and MNs during spinal cord development.  
149 We find that VZD<sub>Shh</sub> is critical for the maintenance of the Olig2 expressing cell population in the  
150 pMN domain during the phase of oligodendrocyte precursor cell (OPC) production. While early  
151 neural tube patterning and MN development can proceed successfully in the absence of these  
152 Shh sources, the pMN domain exhausts of Olig2 expressing cells during neurogenesis leading to  
153 a subsequent and spinal level specific reduction in OPC production. LFP<sub>Shh</sub> is needed for OPC  
154 production throughout the spinal neuraxis. In contrast, MN<sub>Shh</sub>, which occurs earlier at limb levels  
155 than thoracic levels, is critical for maintaining a larger pMN domain at limb levels compared to  
156 thoracic segments throughout OPC production. Our data provides causal evidence for the critical  
157 involvement of sequential and spinal level restricted expression of Shh by VZD for scaling of  
158 OPC production along the neuraxis.

159  
160  
161  
162  
163  
164  
165  
166  
167

168

169

170 **Results:**

171 **Shh expression in the ventral spinal cord**

172 To examine the contributions of different sources of Shh in the ventral spinal cord to  
173 pMN domain activity at the time of the transition from MN to OPC production we first expanded  
174 on previous descriptions of Shh expression during spinal cord development. We used a gene  
175 expression tracer and conditional loss of function allele of Shh (Shh-nLZ<sup>C/C</sup>, abbreviated Shh<sup>C/C</sup>)  
176 in which a bicistronic mRNA is transcribed from the un-recombined Shh locus that encodes Shh  
177 and nuclear targeted LacZ (Gonzalez-Reyes, Verbitsky et al. 2012). The allele allows the  
178 quantification of the numbers of cells that express Shh and the determination of Shh ablation  
179 efficiencies in response to Cre activity with single-cell resolution. This approach reveals  
180 developmental stage- and spinal level- specific patterns of Shh expression and relative  
181 contributions to ventral Shh production from at least 4 distinct cell populations. At brachial  
182 levels at E12.5 we find Shh in all cells of the MFP (defined by co-expression with FoxA2 and  
183 situated at the ventral midline stacking 4-5 cells high along the ventral to dorsal axis), LFP  
184 (defined by reduced levels of FoxA2 and Shh compared to MFP, situated immediately dorsal to  
185 the MFP and stacking about 3-4 cells high along the ventral to dorsal axis), LFP\* (defined by co-  
186 expression of Nkx2.2 and Shh and situated in part at the lateral edges of the LFP and in part as  
187 isolated cells flanking the p3 domain), and in 30% of all motor neurons (MNs) of the lateral  
188 motor column (LMC, defined by co-expression with Hb9 and lateral position in the ventral  
189 horns) (**Fig. 1**). In contrast, at thoracic and lumbar levels at E12.5, we find Shh expression only  
190 in MFP, LFP\*, and LFP (**Fig. 1**). Based on numbers of nLacZ<sup>+</sup> cells present at E12.5 we

191 estimate that about 57% of Shh production occurs by MFP, 30% by the collective LFP and 13%  
192 by MNs at brachial levels while about 50% of Shh production occurs each by MFP and LFP at  
193 thoracic and lumbar levels (**Fig. 1B**). The onset of Shh expression in these tissues is sequential  
194 and overlaps with both MN and OPC production (**Fig. 1C**), suggesting the possibility to dissect  
195 each source's Shh contribution to pMN activity.

196 At E13.5 lumbar LMC MNs begin to express Shh resulting in a pattern of expression that  
197 is qualitatively similar to brachial levels at E12.5 (**Fig. S2A**). By E14.5 medial motor column  
198 (MMC) MNs at all spinal segments begin to express Shh (**Fig. S1A**). At P20 Shh expression  
199 occurs in MNs, V0 cholinergic neurons, and remaining FP cells at all spinal cord segments (**Fig.**  
200 **S1B and S2C**). We observe a similar temporal and segmental pattern of Shh expression in the  
201 developing chick spinal cord (**Fig. S1C**).

202 To investigate the role of Shh signaling from these Shh sources onto the pMN domain,  
203 we generated a series of mouse lines with conditional and in part overlapping ablation of Shh.  
204 We used ChAT-Cre ( $\text{ChAT}_{\text{Shh}}^{-/-}$ ) to target MNs, Nestin-Cre ( $\text{Nestin}_{\text{Shh}}^{-/-}$ ) to target all Shh  
205 expressing VZD (MNs, LFP, and LFP\*), and Olig2-Cre ( $\text{Olig2}_{\text{Shh}}^{-/-}$ ), to target MNs, LFP, and  
206 MFP.

207 At E12.5 we did not observe Shh recombination in MFP cells in  $\text{ChAT}_{\text{Shh}}^{-/-}$  mutants.  
208  $\text{Nestin}_{\text{Shh}}^{-/-}$  mutants had a few MFP cells which displayed Cre activity, but this ablation was  
209 insignificant (**Fig. 1D and 1G**). However, in  $\text{Olig2}_{\text{Shh}}^{-/-}$  mutants the Shh recombination  
210 efficiency among MFP cells in brachial and thoracic spinal segments revealed a significant  
211 ~44% and ~39% loss resp. (**Fig. 1D and 1G**). We found no recombination of Shh in the LFP or  
212 LFP\* in  $\text{ChAT}_{\text{Shh}}^{-/-}$  at brachial or thoracic segments (**Fig. 1D, E, H**). Consistent with the  
213 previous reported expression of Nestin-Cre in all VZD between E10.5 to E12.5 (Kramer et al.,

214 2006), and transient expression of Olig2-Cre in all VZD of the pMN domain and ventral to it  
215 (Ribes and Briscoe, 2009), we find near complete (~80%, and ~90% resp.) ablation of Shh from  
216 the LFP and LFP\* in both Nestin<sup>Shh</sup><sup>-/-</sup> and Olig2<sup>Shh</sup><sup>-/-</sup> in brachial segments (**Fig. 1D, E, H**). At  
217 thoracic segments LFP recombination was less efficient at ~60% and ~72% for Nestin<sup>Shh</sup><sup>-/-</sup> and  
218 Olig2<sup>Shh</sup><sup>-/-</sup> resp. LFP\* recombination was ~77% and ~94% for Nestin<sup>Shh</sup><sup>-/-</sup> and Olig2<sup>Shh</sup><sup>-/-</sup> resp.  
219 (**Fig. 1D, E, H**). Cre efficiency in MNs was about 80% in ChAT<sup>Shh</sup><sup>-/-</sup> and Nestin<sup>Shh</sup><sup>-/-</sup> mutants,  
220 and 98% for Olig2<sup>Shh</sup><sup>-/-</sup> (**Fig. 1F and 1G**). The location of Shh expression and the varied degrees  
221 of ablation of Shh at E12.5 are schematically summarized in **Fig. 1J**.

222 Using a conditional reporter allele (**Fig. 2A**), we find that Olig2-Cre but not Nestin-Cre is  
223 active in the MFP prior to notochord (NC) regression at E10.5 resulting in the ablation of Shh  
224 from  $46 \pm 5.1\%$  and  $8.5 \pm 2.8\%$  resp. of FoxA2<sup>+</sup> cells (**Fig. 2B and 2C**). These results reveal that  
225 the degree of ablation of Shh from MFP in Nestin<sup>Shh</sup><sup>-/-</sup> and Olig2<sup>Shh</sup><sup>-/-</sup> animals is established at  
226 the time of MN production and remains fixed. The drastic loss of Shh expression in the MFP  
227 already at E10.5 in Olig2<sup>Shh</sup><sup>-/-</sup> animals prompted us to ascertain a possible patterning defect along  
228 the ventral midline. Consistent with previous reports that Shh expression by the notochord (NC)  
229 is sufficient for the establishment of precursor domains in the ventral spinal cord (Dessaud,  
230 Ribes et al. 2010, Yu, McGlynn et al. 2013) we find that the relative location and size of the p3-  
231 (Nkx2.2), pMN- (Olig2) and p0- (Dbx1) domains, and the location of the ventral border of the  
232 Pax6 expression domain are indistinguishable between Olig2<sup>Shh</sup><sup>-/-</sup> and control at E10.5 (**Fig. 2D**  
233 **and 2E**).

234 Together, the varied degrees of quantifiable and source selective ablation of Shh from the  
235 ventral spinal cord and the preservation of early ventral tube patterning indicated that this set of

236 recombinant mouse lines might be informative in the investigation of the effect of VZD sources  
237 of Shh onto the pMN domain during MN and OPC generation.

238

### 239 **Shh signaling from MFP, but not VZD sources influences MN generation**

240 We investigated whether ablating Shh from VZD sources would impact the generation of  
241 MNs from Olig2 precursors of the pMN domain. We analyzed columnar pattern, relative  
242 distribution of MNs among columns, and absolute numbers of MNs of different columnar  
243 identity at brachial and thoracic levels. We first visualized MN columnar organization by  
244 immunostainings for MMC (Hb9+ Lhx3+), LMC<sub>M</sub> (Hb9+ Isl1/2+), and LMC<sub>L</sub> (Hb9+, Isl1/2-,  
245 Lhx3-) at brachial (**Fig. 3A**) and MMC (Hb9+, Isl1-), HMC (Hb9+, Isl1/2+), and PGC (Hb9-,  
246 nNos+) at thoracic (**Fig. 3E**) and found no apparent differences in the staining pattern either  
247 among ChAT<sub>Shh</sub><sup>-/-</sup>, Nestin<sub>Shh</sub><sup>-/-</sup>, Olig2<sub>Shh</sub><sup>+/-</sup>, or Olig2<sub>Shh</sub><sup>-/-</sup> compared to Shh<sup>C/C</sup> controls. Further  
248 supporting unaffected MN positioning and patterning, we find inconspicuous ventral root  
249 formation in Olig2<sub>Shh</sub><sup>-/-</sup> compared to Shh<sup>C/C</sup> controls at E10.5 and E12.5. (**Fig. S3**).

250 Quantification of MN numbers revealed no differences in ChAT<sub>Shh</sub><sup>-/-</sup> and Nestin<sub>Shh</sub><sup>-/-</sup>  
251 compared to Shh<sup>C/C</sup> controls at brachial and thoracic levels. In contrast, in Olig2<sub>Shh</sub><sup>+/-</sup> and  
252 Olig2<sub>Shh</sub><sup>-/-</sup> we find a 22% and 38%, resp. reduction in the numbers of total MNs at brachial (**Fig.**  
253 **3B**), and 22% and 32% at thoracic levels compared to Shh<sup>C/C</sup> controls (**Fig. 3F**). Since the  
254 production of late born MNs could be affected to a greater extent than early born MNs by the  
255 ablation of Shh from previously born VZD, we compared the relative size of the MN columns  
256 and the numbers of late born MNs just emerging from the ventricular zone at E12.5. We found  
257 that MNs attained columnar identities in normal relative proportions in all genotypes (**Fig. 3D**  
258 **and 3H**). However, quantification of migrating late born Hb9+ MNs showed a dose-dependent

259 reduction of ~10% in Olig2<sup>Shh</sup><sup>+/-</sup> and 47% in Olig2<sup>Shh</sup><sup>-/-</sup> in brachial, and 23% and 47% resp. in  
260 thoracic segments, suggesting that the deficit in MN generation that we observe in Olig2<sup>Shh</sup><sup>+/-</sup> and  
261 Olig2<sup>Shh</sup><sup>-/-</sup> mice is greatest towards the end of MN production (**Fig. 3I**). We did not observe a  
262 decrease in numbers of late born migrating MNs in ChAT<sup>Shh</sup><sup>-/-</sup> or Nestin<sup>Shh</sup><sup>-/-</sup>. We next examined  
263 if the earlier deficits in MN generation in Olig2<sup>Shh</sup><sup>-/-</sup> mice could be overcome by reduced  
264 apoptosis during the phase of programmed cell death. To this end, we found reduced levels of  
265 Caspase3<sup>+</sup> Hb9<sup>+</sup> brachial MNs in Olig2<sup>Shh</sup><sup>-/-</sup> at E12.5 indicating that reduced cell death of MNs  
266 at least in part will compensate for a reduced rate of MN production in Olig2<sup>Shh</sup><sup>-/-</sup> animals (**Fig.**  
267 **3J**).

268 We associated the degree of reduction in the numbers of MNs with the tissue specific  
269 efficiency of Shh ablation in ChAT<sup>Shh</sup><sup>-/-</sup>, Nestin<sup>Shh</sup><sup>-/-</sup>, and Olig2<sup>Shh</sup><sup>-/-</sup> (**Fig. 3K**). The 80% efficient  
270 ablation of Shh from MNs at brachial levels as well as the near complete ablation of Shh from  
271 the LFP in Nestin<sup>Shh</sup><sup>-/-</sup>, has no effect on MN numbers at E12.5. In contrast, the near complete  
272 ablation of Shh from MNs, LFP and about 50% of MFP in Olig2<sup>Shh</sup><sup>-/-</sup> results in a Shh dose-  
273 dependent reduction of MN numbers at all levels and in all MN columns (**Fig. 3K, orange line**).  
274 Together these results reveal that MN differentiation can proceed in the absence of Shh signaling  
275 from the ventricular zone derivatives MN and LFP, but the efficacy of MN generation becomes  
276 progressively impacted by dose-dependent reductions in Shh signaling from the MFP.

277  
278 **Shh from VZD sources in addition to MFP is critical for pMN domain maintenance during**  
279 **the onset of gliogenesis in a spinal level specific manner.**

280 Previous studies did not evaluate the contribution from individual Shh sources for the  
281 maintenance of established precursor domains after NC retraction. We therefore next

282 investigated ventricular zone organization and precursor domain maintenance in  $\text{ChAT}_{\text{Shh}^{-/-}}$ ,  
283  $\text{Nestin}_{\text{Shh}^{-/-}}$ , and  $\text{Olig2}_{\text{Shh}^{-/-}}$ . We find that the relative location and distance to each other of the p3,  
284 pMN, and p0 precursor domains are preserved in  $\text{ChAT}_{\text{Shh}^{-/-}}$ ,  $\text{Nestin}_{\text{Shh}^{-/-}}$ , and  $\text{Olig2}_{\text{Shh}^{-/-}}$  at E12.5  
285 (**Fig. 4A**). However, we observe a Shh source and dose-dependent, spinal level-specific decline  
286 in the numbers of  $\text{Olig2}^{+}$  cells in the pMN domain of  $\text{ChAT}_{\text{Shh}^{-/-}}$ ,  $\text{Olig2}_{\text{Shh}^{+/-}}$ ,  $\text{Nestin}_{\text{Shh}^{-/-}}$ , and  
287  $\text{Olig2}_{\text{Shh}^{-/-}}$  compared to  $\text{Shh}^{\text{C/C}}$  or  $\text{Olig2-Cre}$  control (**Fig. 4B and 4C**).

288 In  $\text{ChAT}_{\text{Shh}^{-/-}}$  we find a 26% decrease in pMN/ $\text{Olig2}^{+}$  cells ( $\text{pMN}_{\text{Olig2}^{+}}$ ) at brachial levels  
289 (but not at thoracic or lumbar) consistent with expression of Shh in MNs at brachial but not yet  
290 in MNs at thoracic and lumbar levels which will begin to express Shh about one day later (**Fig.**  
291 **4C**). Upon more detailed analysis, we find the effect of MN Shh to become progressively more  
292 pronounced during the rapid enlargement of the pMN that occurs at brachial segments between  
293 E12.5 to E12.75 (**Fig. 4D and 4E**). The numbers of  $\text{pMN}_{\text{Olig2}^{+}}$  cells in  $\text{Nestin}_{\text{Shh}^{-/-}}$  displays an  
294 anterior-posterior progressive decrease of 40% at brachial, 51% at thoracic, and 59% at lumbar  
295 segments (**Fig. 4B and 4C**). The most severely affected genotype is  $\text{Olig2}_{\text{Shh}^{-/-}}$  with a decrease in  
296  $\text{pMN}_{\text{Olig2}^{+}}$  cells of 66% at brachial, 61% at thoracic, and 72% at lumbar (**Fig. 4B and 4C**).

297 We next associated the degree of reduction in the numbers of  $\text{pMN}_{\text{Olig2}^{+}}$  cells at brachial  
298 and thoracic levels with the time of onset and tissue specific efficiency of Shh ablation in  
299  $\text{ChAT}_{\text{Shh}^{-/-}}$ ,  $\text{Olig2}_{\text{Shh}^{-/-}}$ , and  $\text{Nestin}_{\text{Shh}^{-/-}}$  (**Fig. 4F**). In controls, we find about 19% more  $\text{pMN}_{\text{Olig2}^{+}}$   
300 cells at brachial than thoracic segments. The 80% efficient ablation of Shh from MNs in  
301  $\text{ChAT}_{\text{Shh}^{-/-}}$  reduces the numbers of  $\text{pMN}_{\text{Olig2}^{+}}$  cells at brachial levels to those present in controls  
302 at thoracic levels while the ablation of Shh from MNs has no effect on the numbers of  $\text{pMN}_{\text{Olig2}^{+}}$   
303 cells at thoracic levels (**Fig. 4F, red line**).  $\text{Nestin}_{\text{Shh}^{-/-}}$  and  $\text{Olig2}_{\text{Shh}^{-/-}}$  exhibit near complete  
304 ablation of Shh from MNs and LFP, but significantly different ablation efficiencies in the MFP,

305 resulting in a reduction of  $\text{pMN}_{\text{Olig2}^+}$  cells at brachial levels that scales with the degree of Shh  
306 ablation from the MFP. At thoracic levels, however, we find the same magnitude in the reduction  
307 of the numbers of  $\text{pMN}_{\text{Olig2}^+}$  cells in  $\text{Nestin}_{\text{Shh}^{-/-}}$  and  $\text{Olig2}_{\text{Shh}^{-/-}}$  despite of a much greater total  
308 reduction in numbers of Shh producing cells by Olig2-Cre compared to Nestin-Cre. This  
309 observation suggests that Shh produced by LFP cells, though few in number, has a  
310 disproportionate significance compared to MFP derived Shh for  $\text{pMN}_{\text{Olig2}^+}$  cells at thoracic  
311 segments.

312         Next, we determined if the decreased numbers of  $\text{pMN}_{\text{Olig2}^+}$  cells is the result of  
313 diminished initial specification or a failure of maintenance. We lineage traced Olig2 cells in  
314  $\text{Olig2}_{\text{Shh}^{-/-}}$  mutants,  $\text{Olig2}_{\text{Shh}^{+/-}}$  controls, and Olig2-Cre controls using the R26mT/mG reporter  
315 allele from which myristylated GFP is expressed in all derivatives of Olig2 expressing cells and  
316 immunostained for Olig2 at E12.5 (**Fig. 5A**). We observe GFP expression in the ventral spinal  
317 cord forming a dorsal boundary at a similar relative distance to the MFP in mutants and controls  
318 but a decline in  $\text{pMN}_{\text{Olig2}^+}$  GFP+ double positive cells in mutants compared to controls. Notably,  
319 the absence of Olig2 expressing cells within the GFP labeled area in mutants is most pronounced  
320 in the dorsal half of the pMN domain. Together, these results demonstrate that ongoing Shh  
321 signaling originating from VZD in addition to MFP are critical for the selective maintenance of  
322  $\text{pMN}_{\text{Olig2}^+}$  cells once the influence of notochord Shh has waned and the pMN switches to  
323 gliogenesis of OPCs.

324         Providing further evidence for decreased pMN domain activity at the beginning of OPC  
325 production at E12.5 we find a ~3-fold reduction in the size of p\* precursor domain in  $\text{Olig2}_{\text{Shh}^{-/-}}$   
326 compared to controls (**Fig. 5B and 5C**). The p\* domain forms at the ventral border of the pMN  
327 domain and is marked by  $\text{Olig2}^+/\text{Nkx2.2}^+$  cells (Agius et al., 2004). Interestingly, we found

328 LFP\* cells (which we define as Nkx2.2+ nLacZ+ cells) in direct contact with Nkx2.2+ Olig2+  
329 double positive cells of the p\* domain in Shh<sup>C/C</sup> controls, highlighting a cyto-architectural  
330 arrangement that could underpin the disproportionate importance of LFP compared to MFP<sub>Shh</sub>  
331 for the maintenance of the pMN<sub>Olig2</sub><sup>+</sup> cell population (**Fig. 5B**).

332

333 **Diminishment of pMN<sub>Olig2</sub><sup>+</sup> cells during the phase of ventral oligodendrogenesis results in**  
334 **reduced OPC production.**

335 Reduced Shh signaling originating from MNs, LFP, or MFP leaves the pMN domain  
336 impoverished of pMN<sub>Olig2</sub><sup>+</sup> cells at the beginning of oligodendrogenesis (**Fig. 4**). Nevertheless,  
337 the pMN<sub>Olig2</sub><sup>+</sup> cell population could recover during OPC production by increased precursor  
338 recruitment from dorsal ventricular precursor domains (Ravanelli and Appel 2015), proliferation  
339 of remaining pMN<sub>Olig2</sub><sup>+</sup> precursor cells, or increased differentiation and amplification of OPC  
340 fated cells that have left the pMN domain. We therefore first visualized the size of pMN<sub>Olig2</sub><sup>+</sup>  
341 population at the end of ventral oligodendrogenesis at E14.5. We find a moderate reduction in  
342 the numbers of pMN<sub>Olig2</sub><sup>+</sup> cells in ChAT<sub>Shh</sub><sup>-/-</sup> and an almost complete absence of pMN<sub>Olig2</sub><sup>+</sup> cells  
343 in Nestin<sub>Shh</sub><sup>-/-</sup> and Olig2<sub>Shh</sub><sup>-/-</sup> compared to Shh<sup>C/C</sup> controls suggesting that increased recruitment of  
344 precursors to the pMN domain does not occur in mutants (**Fig. S4 and Fig. 6A**). We then  
345 determined whether pMN<sub>Olig2</sub><sup>+</sup> cells and/or migrating OPCs in Olig2<sub>Shh</sub><sup>-/-</sup> increase their rate of  
346 proliferation during the phase of OPC production. We injected EdU into pregnant dams at E11.5,  
347 E12.5, and E13.5 and quantified the numbers of pMN<sub>Olig2</sub><sup>+</sup> cells 24h later. We found comparable  
348 broad EdU+ labeling throughout the ventricular zone of Olig2<sub>Shh</sub><sup>-/-</sup> mutants and controls,  
349 suggesting overall progenitor proliferation is not affected in mutants (**Fig. 6A**). Within the pMN  
350 domain we observe a ~25% decrease in the numbers of pMN<sub>Olig2</sub><sup>+</sup> cells in Shh<sup>C/C</sup> controls over

351 the course of OPC production from E12.5 to E14.5 (**Fig. 6B**). In contrast, numbers of  $\text{pMN}_{\text{Olig2}^+}$   
352 cells in  $\text{Olig2}_{\text{Shh}^{-/-}}$  mutants decline to near undetectable levels during the same period indicating a  
353 precocious exhaustion of the  $\text{pMN}_{\text{Olig2}^+}$  cell population during OPC generation (**Fig. 6B**). We  
354 next determined the rate of proliferation of  $\text{pMN}_{\text{Olig2}^+}$  cells in controls and mutants. In controls,  
355 we find a similar proliferative rate of about 47% of  $\text{pMN}_{\text{Olig2}^+}$  cells at E12.5, E13.5 and E14.5. In  
356 contrast, in  $\text{Olig2}_{\text{Shh}^{-/-}}$  we find the rate of proliferation to be reduced to 37% at E12.5 and E13.5,  
357 followed by a further decrease to 16% by E14.5 (**Fig. 6C**). These results indicate that the  
358 precocious exhaustion of the  $\text{pMN}_{\text{Olig2}^+}$  cell population is associated with a reduced proliferation  
359 rate of precursor cells during OPC production which is compounded by reduced numbers of  
360  $\text{pMN}_{\text{Olig2}^+}$  cells that are present at the beginning of OPC production.

361 We next tested whether OPC production in  $\text{Olig2}_{\text{Shh}^{-/-}}$  recovers through increased  
362 amplification of precursors once they have emerged from the pMN. We analyzed numbers of  
363 EdU+  $\text{Olig2}^+$  cells in the mantle zone (**Fig. 6D**). While there are very few  $\text{Olig2}^+$  cells in the  
364 mantle zone of mutants and controls at E12.5, with ongoing expansion of these cells, we find a 3-  
365 fold and 15-fold reduction of  $\text{Olig2}^+$  cells at E13.5 and E14.5, resp.in mutants compared to  
366 controls (**Fig. 6E**). The rate of proliferation among  $\text{Olig2}^+$  cells in the mantle zone in  $\text{Olig2}_{\text{Shh}^{-/-}}$   
367 is similar at E13.5 and E14.5 compared to controls suggesting that OPCs in mutants do not  
368 amplify at an increased rate compared to controls (**Fig. 6F**). The cells that do emerge from the  
369 pMN in  $\text{Olig2}_{\text{Shh}^{-/-}}$  disperse as rapidly as their control counterparts, resulting in a ventral spinal  
370 cord that is populated with nascent OPCs with a 15-fold lower density compared to controls (**Fig.**  
371 **S5**). Additionally, we examined OPC proliferation at E14.5 in posterior thoracic and lumbar  
372 segments and found no detectable increase in proliferation rate in any of the pMN, mantle, or  
373 white matter (WM) areas (**Fig. S6**). These results reveal that the yield of the pMN domain during

374 OPC production largely determines the numbers of OPCs that settle in white and grey matter.  
375 Thus the scaled production of OPCs and oligodendrocyte along the anterior posterior extent of  
376 the spinal cord must at least in part be determined by the patterned expression of  $VZD_{Shh}$  that we  
377 find to be critical for the maintenance of the  $pMN_{Olig2+}$  precursor population.

378

379

380

381

382

383

384

385

386

387

388

389

390

391

392 ***Discussion:***

393 Our study provides causal evidence that the sequential and patterned expression of Shh by  
394 previously specified cell types in the ventral spinal cord is critical for scaled oligodendrocyte  
395 precursor specification along the anterior posterior axis of the developing spinal cord. We took  
396 advantage of neural tube development as an established model system to reveal that Shh-  
397 expressing signaling centers become established among post mitotic derivatives of ventricular  
398 zone differentiation ( $VZD_{Shh}$ ) in a temporally- and spatially-patterned manner as development  
399 proceeds. We find that  $VZD_{Shh}$  signaling is critical for the production of OPCs in proportionate  
400 numbers to previously specified neurons. Our data provides genetic evidence in support of the  
401 hypothesis that extra-midline sources of Shh are critical for switching neurogenesis to  
402 gliogenesis and add a novel mechanism that contributes to pattern scaling along the anterior to  
403 posterior axis. Our observations do not rule out contributions of other well-established cell-  
404 autonomous and cell non-autonomous mechanisms that adapt morphogen function and allow  
405 pattern scaling (Houchmandzadeh, Wieschaus et al. 2005, Ben-Zvi and Barkai 2010,  
406 Hamaratoglu, de Lachapelle et al. 2011, Ben-Zvi, Fainsod et al. 2014, Uygur, Young et al. 2016),  
407 but provide a mechanism by which Shh mediated signaling from the midline in the ventral neural  
408 tube becomes progressively augmented such that Shh signaling remains a relevant instructive  
409 signal despite rapid growth.

410 ***Sequential expression and function of  $VZD_{Shh}$ .***

411 Despite its complexity, development is orchestrated by the actions of just a handful of  
412 morphogens. The temporal and spatial segregation of developmental fields that are patterned by

413 morphogens can allow the same morphogen to play an instructive role repeatedly and at multiple  
414 anatomic regions specifying vastly different cell types and tissues. However, in the developing  
415 spinal cord all cell types are descendants of the same developmental field, the ventricular zone,  
416 yet the same morphogen, Shh, is involved in the sequential specification of multiple cell types  
417 (Dessaud, McMahon et al. 2008). The number of source tissues of Shh in the ventral spinal cord  
418 expands concomitantly with development, suggesting that “moving the Shh source” might play  
419 an important role (Danesin and Soula, 2017). We reassessed Shh expression in mice using a  
420 nuclear targeted LacZ based gene expression tracer allele and verified the principle findings in  
421 chick by RNA in situ. The advantage of the gene expression tracer allele is that the identity,  
422 location and numbers of Shh expression can be determined with single-cell resolution. Ablating  
423 Shh and nLacZ by Nestin-Cre, which is expressed in the ventricular zone, reveals that one half to  
424 one third of all Shh expressing cells in the ventral spinal cord are ventricular zone descendants at  
425 the time that Shh signaling strength within the pMN domain rises coincident with the switch  
426 from neurogenesis to gliogenesis (Dessaud, Yang et al. 2007, Balaskas, Ribeiro et al. 2012,  
427 Touahri, Escalas et al. 2012, Kicheva, Bollenbach et al. 2014, Kicheva and Briscoe 2015). While  
428 the gene expression tracer allele cannot be used to draw conclusions about the relative Shh  
429 signaling strength in the ventricular zone that is contributed by  $VZD_{Shh}$ , the anatomic  
430 arrangement of these sources and the genetic ablation of Shh from these sources suggests a  
431 disproportionate effect on the activity of the pMN domain. The LFP proper extends the midline  
432 source of Shh by several cell diameters more dorsally as previously observed (Charrier et al.,  
433 2002). A subset of LFP cells, which we designate here as LFP\* cells, co-express Nkx2.2 and Shh  
434 (Al Oustah, Danesin et al. 2014) and are in direct contact with cells that co-express the Shh high-  
435 threshold genes Nkx2.2+ Olig2+ and form the p\* domain at the beginning of oligodendrogenesis

436 (Fu, Qi et al. 2002, Traiffort, Zakaria et al. 2016). At the same developmental stage, we detect  
437 expression of Shh in the nascent lateral, but not medial, MN column in mice and chick. Shh can  
438 be released from the axonal as well as the dendritic compartment of neurons ((Beug, Parks et al.  
439 2011). Hence nascent MNs could secrete Shh via dendrites or possibly trailing cellular processes  
440 close to the pMN domain. Together, the spatial and temporal pattern of  $VZD_{Shh}$  expression that  
441 we observe is consistent with the results from our selective gene ablation studies which  
442 demonstrate that these sources of Shh influence pMN domain activity, a speculation put forward  
443 previously in regard of the function of  $LFP_{Shh}$  (Danesin and Soula 2017).

444 A striking feature of the phenotype of Shh ablation from VZD is the temporal and qualitative  
445 segregation of the effects on MN and OPC production.  $VZD_{Shh}$  has no detectable effect on MN  
446 production or the extent of programmed cell death of MNs in our paradigms. In contrast, ablation  
447 of  $VZD_{Shh}$  results in severely reduced OPC production: (1) During the period of OPC production  
448 the initial 2-fold diminishment of  $pMN_{Olig2}^+$  cells increases to a more than 10-fold reduction in  
449  $pMNOlig2^+$  cells compared to controls. (2) During the same period, the numbers of  $Olig2^+$  cells  
450 that emerge from the pMN domain drop 10-fold. (3) The proliferation rate of these nascent OPCs  
451 is equal to or lower compared to their control counterparts. Together these observations reveal  
452 that the numbers of OPCs that emigrate from the pMN domain and settle in the white and grey  
453 matter are determined mainly by the size of the  $pMN_{Olig2^+}$  precursor cell population.

454 The relative contribution of  $VZD_{Shh}$  to regulating the size of the  $pMN_{Olig2^+}$  precursor cell  
455 population is spinal level specific. For example, the ablation of  $VZD_{Shh}$  results in a  $pMN_{Olig2}^+$   
456 loss of about 40% at brachial levels. Half of that effect at brachial levels can be attributed to the  
457 expression of  $MN_{Shh}$  since the ablation of Shh from cholinergic neurons by ChAT-Cre alone  
458 results in an almost 26% reduction in the size of the  $pMN_{Olig2}^+$  population (**Fig. 3.2B**). The

459 remaining size of the  $\text{pMN}_{\text{Olig2}^+}$  population at brachial levels in the  $\text{ChAT}_{\text{Shh}^{-/-}}$  spinal cord is  
460 similar to the average size of the  $\text{pMN}_{\text{Olig2}^+}$  domain at thoracic levels in control spinal cords.  
461 Since thoracic MNs do not express Shh until the end of OPC production at E14.5, our  
462 observations reveal that the increased size of the pMN domain at brachial levels is dependent on  
463  $\text{MN}_{\text{Shh}}$ . Thus, the selective expression of  $\text{MN}_{\text{Shh}}$  at brachial and lumbar levels provides a  
464 mechanism for ensuring a proportionate increase in the production of OPCs at brachial and  
465 lumbar - compared to thoracic- levels that is matched to the increased numbers of MNs at limb  
466 levels.

467 ***Potential mechanisms of actions of  $\text{VZD}_{\text{Shh}}$ .***

468 Does Shh from different sources have distinct functions in the ventricular zone of the  
469 ventral spinal cord? Three observations support origin specific functions of Shh in the ventral  
470 spinal cord in the pMN domain: (1)  $\text{MFP}_{\text{Shh}}$  but not  $\text{VZD}_{\text{Shh}}$  influences MN production (Fig. 3).  
471 Consistent, ablation of Shh in the MFP by  $\text{Olig2-Cre}$  is complete at the beginning of MN  
472 production while ablation of Shh in VZD by  $\text{Nestin-Cre}$  only begins towards the end of MN  
473 generation (Fig. 1). In further support of a critical role of  $\text{MFP}_{\text{Shh}}$  in MN generation and  
474 consistent with previous findings (Yu, McGlynn et al. 2013), we find a Shh gene dose-dependent  
475 reduction of the numbers of MNs of similar magnitude among early and late forming MN  
476 columns as well as late born MNs still in transit at E12.5. Hence, based on the timing of Shh  
477 expression and the consistent deficit in MN production throughout the period of MN generation,  
478 the reduced rate of MN production must be associated with the reduction of midline-derived Shh  
479 rather than VZD-derived Shh. Strikingly, however, whether Shh expression is ablated from all  
480 VZDs ( $\text{Nestin}_{\text{Shh}^{-/-}}$ ) or partially from the MFP in addition to LFP and MNs ( $\text{Olig2}_{\text{Shh}^{-/-}}$ ), the pMN  
481 domain is left with similar strongly reduced numbers of  $\text{pMN}_{\text{Olig2}^+}$  cells at the end of MN

482 production (Fig. 2). Since ventral precursor domains form normally and a full complement of  
483  $\text{pMN}_{\text{Olig2}^+}$  cells is induced in  $\text{Olig2}_{\text{Shh}^{-/-}}$  (Fig. 1), these results point to distinct functions of Shh  
484 derived from the MFP and VZDs in pMN domain activity: Our data indicates that  $\text{MFP}_{\text{Shh}}$   
485 determines the rate of MN production while  $\text{VZD}_{\text{Shh}}$  is critical to counteract the exhaustion of the  
486  $\text{pMN}_{\text{Olig2}^+}$  population during MN production. (2) We find that the high threshold, Shh dependent  
487 and p\* domain defining co-expression of Nkx2.2 and Olig2 (Fu, Qi et al. 2002) occurs in cells  
488 that are in close proximity to LFP\* cells. Ablation of  $\text{VZD}_{\text{Shh}}$  results in a 3-fold reduction in the  
489 numbers of Nkx2.2/Olig2 expressing cells at E12.5 (Fig. 4). Additional ablation of Shh from  
490 50% of the MFP in  $\text{Olig2}_{\text{Shh}^{-/-}}$  did not increase the severity of this phenotype (Fig. 4). Thus,  
491 consistent with the anatomic juxtaposition of LFP cells to p\* domain cells our gene ablation  
492 studies demonstrate that  $\text{VZD}_{\text{Shh}}$  is critical for the production of the Nkx2.2 expressing  
493 subpopulation of ventral oligodendrocyte lineage cells. (3) The dorsal most aspects of the pMN  
494 domain is almost completely devoid of Olig2+ expressing cells at the end of MN production at  
495 E12.5 in  $\text{Nestin}_{\text{Shh}^{-/-}}$  and  $\text{Olig2}_{\text{Shh}^{-/-}}$  (Fig. 2). Given that early pioneer OPCs elaborate cellular  
496 contacts selectively with MNs (Osterstock, Le Bras et al. 2018) it seems plausible that the LFP  
497 and MFP most distant pMN areas are served selectively by Shh from  $\text{MN}_{\text{Shh}}$ . In this scenario Shh  
498 signaling from different sources might subdivide the pMN domain into sub-regions from which  
499 distinct oligodendrocyte subtypes might emerge (Dimou and Simons 2017, Ravanelli, Kearns et  
500 al. 2018) Dependent on the mode of delivery,  $\text{VZD}_{\text{Shh}}$  could also exhibit distinct modes of  
501 action: for example,  $\text{LFP}_{\text{Shh}}$  could result in maintenance of Olig2 expression in pMN precursor  
502 cells while  $\text{MN}_{\text{Shh}}$  could attract precursor cells to migrate into the pMN domain from the dorsal  
503 ventricular zone as is observed in zebrafish (Ravanelli and Appel, 2015).  
504 Together, our data provides genetic evidence in support of the idea that morphogen signaling centers  
505 are established sequentially in the developing ventral spinal cord. These new “organizer tissues” express

506 Shh which acts together with Shh produced by the medial floor plate to influence SVZ activity as the  
507 spinal cord grows. These Shh sources are critically involved in the switch of neurogenesis to  
508 oligodendrogenesis in the pMN domain. Endowing VZDs with morphogenic activity makes subsequent  
509 differentiation conditional to the completion of previous developmental milestones in the ventral spinal  
510 cord. Further, expression of the morphogen linked to the numbers and types of VZDs produced,  
511 provides a mechanism that could ensure scale invariance in regard of neuron and glia production along  
512 the anterior-posterior axis of the spinal cord.

513  
514 Acknowledgements: We thank Artur Kania for comments on earlier versions of the manuscript.  
515 We thank Thomas Jessell, Susan Morton, Ben Novitch, Sam Pfaff for reagents. LS performed the  
516 experiments, analyzed data and wrote the manuscript. AHK conceived the work, interpreted the  
517 results and wrote the manuscript. LS was funded in part by the Graduate Center of the City  
518 University of New York.

519  
520  
521  
522  
523  
524  
525  
526  
527  
528  
529

530

531

532

533

534

## 535 *Materials and Methods*

536

### 537 *Transgenic Mice*

538

539 All animal experiments were approved by the Institutional Animal Use Care Committee at  
540 CUNY. The following mouse strains were used and genotyped as described previously: Shh-  
541 nLZ<sup>L/+</sup> animals (Gonzalez-Reyes et al., 2012), Chat-Cre (Rossi et al., 2011), Olig2-Cre (Dessaud  
542 2007), Nestin-Cre (Tronche et al., 1999), Rosa26<sup>mT/mG</sup> (Muzumdar et al., 2007). Mice were  
543 maintained on a C57BL/6 background. Noon on the day of the plug was considered E0.5. Mice  
544 were kept on a 12 hr dark/light cycle and the day of birth designated P1. For E12.25, E12.50, and  
545 E12.75 pMN analysis, pregnant dams were sacrificed at E12.5 according to plug date and  
546 embryos were binned into three groups (E12.25, E12.50, and E12.75), based on how many  
547 Olig2<sup>+</sup> cells have migrated out of the pMN domain. Embryo sections which had an average of  
548 less than 5 cells migrate out of the pMN were considered 12.25, 5-20 cells migrating out –  
549 E12.50, and >20 cells migrating out - E12.75.

550

### 551 *In vivo EdU Assay*

552

553 Pregnant dams received EdU (5-ethynyl-20 -deoxyuridine, Invitrogen) dissolved in PBS by  
554 intraperitoneal injection (50 mg/kg) and sacrificed after 24 hours. Tissue sections were stained  
555 using the Click-iT Plus EdU Alexa Fluor 647 Imaging Kit (Thermofisher).

556

557

### 558 *Tissue Processing*

559

560 All mice were sacrificed using an overdose of anesthetic, subjected to transcardial perfusion with  
561 4% (w/v) paraformaldehyde (PFA) in 0.1 M PBS pH 7.4. Spinal cords and embryos were  
562 dissected, postfixed in 4% PFA for 1 hr at 4°C, cryoprotected with 30% (w/v) sucrose in 0.1M  
563 PBS for 24–48 hr, embedded and frozen in OCT medium, and stored at –80°C. Tissues were  
564 sectioned at 20 µm and collected onto glass slides.

565

### 566 *Immunocytochemistry and Microscopy*

567

568 20µm thick spinal cord cryosections were air dried for 30 min. Then sections were washed with  
569 PBS for 10 mins and with 0.3% [v/v] Triton X-100 in PBS for 20 min. Sections were then pre-  
570 treated with blocking solution (10% [v/v] horse serum and 0.3% [v/v] Triton X-100 in PBS) for  
571 90 mins and incubated with primary antibodies overnight at 4C. The next day, following 3 PBS  
572 washes the sections were incubated with secondary antibodies for 2 hr at room temperature. A  
573 list of all antibodies and compounds used is provided in a table. For cell counts, at least three  
574 sections per animal from at least three mice were examined, unless otherwise noted. Images were  
575 acquired using a Zeiss LSM880 confocal microscope.

576  
 577 Statistical analysis was performed using Prism 7 (Graphpad Software Inc.) Analysis of multiple  
 578 groups was made using one-way ANOVA followed by the Tukey or Dunnett's post hoc analysis  
 579 tests. For 2-groups analyses, unpaired Student's t test was used. The data are presented  
 580 graphically as: \*(p < 0.05), \*\*(p < 0.01), and \*\*\*(p < 0.001).

581  
 582

| REAGENT                                        | SOURCE           | IDENTIFIER                         |
|------------------------------------------------|------------------|------------------------------------|
| <b>Antibodies</b>                              |                  |                                    |
| Chicken polyclonal anti beta Galactosidase     | Abcam            | Cat# ab9361,<br>RRID:AB_307210     |
| Goat polyclonal anti beta Galactosidase        | Biogenesis       | Cat# 4600-1409,<br>RRID:AB_2314510 |
| Goat polyclonal anti Choline acetyltransferase | Millipore        | Cat# AB144P,<br>RRID:AB_2079751    |
| Rabbit polyclonal anti Olig2                   | Millipore        | Cat#AB9610,<br>RRID:AB_570666      |
| Mouse monoclonal anti Nkx2.2                   | DSHB             | Cat# 74.5A5,<br>RRID:AB_531794     |
| Rabbit polyclonal anti nNos                    | Immunostar       | Cat# 24431,<br>RRID:AB_572255      |
| Mouse monoclonal Ankyrin G (AnkG) (463)        | Santa Cruz       | Cat# sc-12719,<br>RRID:AB_626674   |
| Mouse monoclonal Lim3 (Lhx3)                   | DSHB             | Cat# 67.4E12,<br>RRID:AB_2135805   |
| Rabbit polyclonal Lim1                         | Gift Jessell Lab | N/A                                |
| Guinea Pig polyclonal Hb9                      | Gift Jessell Lab | N/A                                |
| Rabbit polyclonal FoxA2                        | Gift Jessell Lab | N/A                                |
| Rabbit polyclonal Pax6                         | Gift Jessell Lab | N/A                                |
| Rabbit polyclonal Dbx1                         | Gift Jessell Lab | N/A                                |

|                                  |                        |                                   |
|----------------------------------|------------------------|-----------------------------------|
| Rabbit polyclonal Isl1/1         | Gift Jessell Lab       | N/A                               |
| Rabbit polyclonal anti Nkx2.2    | Gift Jessell Lab       | N/A                               |
| Donkey anti rabbit Alexa 488     | Jackson ImmunoResearch | Cat# 711-545-152, RRID:AB_2313584 |
| Donkey anti mouse Alexa 488      | Jackson ImmunoResearch | Cat# 715-545-150, RRID:AB_2340846 |
| Donkey anti guinea pig Alexa 488 | Jackson ImmunoResearch | Cat# 706-545-148, RRID:AB_2340472 |
| Donkey anti goat Alexa 488       | Jackson ImmunoResearch | Cat# 705-545-147, RRID:AB_2336933 |
| Donkey anti rabbit Cy3           | Jackson ImmunoResearch | Cat# 711-165-152, RRID:AB_2307443 |
| Donkey anti mouse Cy3            | Jackson ImmunoResearch | Cat# 715-165-150, RRID:AB_2340813 |
| Donkey anti guinea pig Cy3       | Jackson ImmunoResearch | Cat# 706-165-148, RRID:AB_2340460 |
| Donkey anti rat Cy3              | Jackson ImmunoResearch | Cat# 712-165-153, RRID:AB_2340667 |
| Donkey anti rabbit Alexa 594     | Jackson ImmunoResearch | Cat# 711-585-152, RRID:AB_2340621 |
| Donkey anti mouse Alexa 594      | Jackson ImmunoResearch | Cat# 715-585-150, RRID:AB_2340854 |
| Donkey anti guinea pig Alexa 594 | Jackson ImmunoResearch | Cat# 706-585-148, RRID:AB_2340474 |
| Donkey anti rat Alexa 594        | Jackson ImmunoResearch | Cat# 712-585-153, RRID:AB_2340689 |
| Donkey anti chicken Cy5          | Jackson ImmunoResearch | Cat# 703-175-155, RRID:AB_2340365 |
| Donkey anti goat Cy5             | Jackson ImmunoResearch | Cat# 705-175-147, RRID:AB_2340415 |
| Donkey anti mouse Cy5            | Jackson ImmunoResearch | Cat# 715-175-150, RRID:AB_2340819 |
| Donkey anti guinea pig Alexa Cy5 | Jackson ImmunoResearch | Cat# 706-175-148, RRID:AB_2340462 |

|                                                               |                                |                            |
|---------------------------------------------------------------|--------------------------------|----------------------------|
|                                                               |                                |                            |
| <b>Chemicals</b>                                              |                                |                            |
| X-Gal                                                         | Roche                          | 10745740001; CAS 7240-90-6 |
| DAPI                                                          | Sigma Aldrich                  | CAS 28718-90-3             |
| <b>Commercial Assays</b>                                      |                                |                            |
| Click-iT EdU                                                  | Thermofisher                   | C10340                     |
|                                                               |                                |                            |
| <b>Mouse Strains</b>                                          |                                |                            |
| Mouse: Shh <sup>tm1Ahk</sup>                                  | Gonzalez-Reyes L, et al., 2012 | MGI:5440762                |
| Mouse: B6;129S6-Chat <sup>tm1(cre)Lowl/J</sup>                | The Jackson Laboratory         | JAX: 006410                |
| Mouse: B6.Cg-Tg(Nes-cre)1Kln/J                                | The Jackson Laboratory         | JAX: 003771                |
| Mouse: Olig2 <sup>tm1(cre)Tmj</sup>                           | Dessaud E, et al., 2007        | MGI:3774124                |
| Mouse: Gt(ROSA)26Sor <sup>tm4(ACTB-tdTomato,-EGFP)Luo/J</sup> | The Jackson Laboratory         | JAX: 007576                |

583  
584  
585  
586  
587  
588  
589  
590  
591  
592  
593  
594  
595  
596  
597  
598  
599

600  
601  
602  
603  
604  
605  
606  
607  
608  
609  
610  
611  
612  
613  
614  
615  
616  
617  
618  
619  
620  
621  
622  
623  
624  
625  
626  
627  
628  
629  
630  
631  
632  
633  
634  
635  
636  
637  
638  
639  
640  
641  
642  
643  
644

**References:**

Akazawa, C., H. Tsuzuki, Y. Nakamura, Y. Sasaki, K. Ohsaki, S. Nakamura, Y. Arakawa and S. Kohsaka (2004). "The upregulated expression of sonic hedgehog in motor neurons after rat facial nerve axotomy." *J Neurosci* **24**(36): 7923-7930.

Al Oustah, A., C. Danesin, N. Khouri-Farah, M. A. Farreny, N. Escalas, P. Cochard, B. Glise and C. Soula (2014). "Dynamics of sonic hedgehog signaling in the ventral spinal cord are controlled by intrinsic changes in source cells requiring sulfatase 1." *Development* **141**(6): 1392-1403.

Alaynick, W. A., T. M. Jessell and S. L. Pfaff (2011). "SnapShot: spinal cord development." *Cell* **146**(1): 178-178 e171.

Balaskas, N., A. Ribeiro, J. Panovska, E. Dessaud, N. Sasai, K. M. Page, J. Briscoe and V. Ribes (2012). "Gene regulatory logic for reading the Sonic Hedgehog signaling gradient in the vertebrate neural tube." *Cell* **148**(1-2): 273-284.

Barkai, N. and D. Ben-Zvi (2009). "'Big frog, small frog'--maintaining proportions in embryonic development: delivered on 2 July 2008 at the 33rd FEBS Congress in Athens, Greece." *FEBS J* **276**(5): 1196-1207.

Ben-Zvi, D. and N. Barkai (2010). "Scaling of morphogen gradients by an expansion-repression integral feedback control." *Proc Natl Acad Sci U S A* **107**(15): 6924-6929.

Ben-Zvi, D., A. Fainsod, B. Z. Shilo and N. Barkai (2014). "Scaling of dorsal-ventral patterning in the *Xenopus laevis* embryo." *Bioessays* **36**(2): 151-156.

Bergles, D. E. and W. D. Richardson (2015). "Oligodendrocyte Development and Plasticity." *Cold Spring Harb Perspect Biol* **8**(2): a020453.

Beug, S. T., R. J. Parks, H. M. McBride and V. A. Wallace (2011). "Processing-dependent trafficking of Sonic hedgehog to the regulated secretory pathway in neurons." *Mol Cell Neurosci* **46**(3): 583-596.

Bjugn, R. and H. J. Gundersen (1993). "Estimate of the total number of neurons and glial and endothelial cells in the rat spinal cord by means of the optical disector." *J Comp Neurol* **328**(3): 406-414.

Briscoe, J. and J. Ericson (1999). "The specification of neuronal identity by graded Sonic Hedgehog signalling." *Semin Cell Dev Biol* **10**(3): 353-362.

Briscoe, J., A. Pierani, T. M. Jessell and J. Ericson (2000). "A homeodomain protein code specifies progenitor cell identity and neuronal fate in the ventral neural tube." *Cell* **101**(4): 435-445.

Charrier, J. B., F. Lapointe, N. M. Le Douarin and M. A. Teillet (2002). "Dual origin of the floor plate in the avian embryo." *Development* **129**(20): 4785-4796.

- 645 Cheung, D., C. Miles, M. Kreitman and J. Ma (2014). "Adaptation of the length scale and amplitude of the  
646 Bicoid gradient profile to achieve robust patterning in abnormally large *Drosophila melanogaster*  
647 embryos." Development **141**(1): 124-135.
- 648 Cohen, M., A. Kicheva, A. Ribeiro, R. Blassberg, K. M. Page, C. P. Barnes and J. Briscoe (2015). "Ptch1 and  
649 Gli regulate Shh signalling dynamics via multiple mechanisms." Nat Commun **6**: 6709.
- 650 Danesin, C., E. Agius, N. Escalas, X. Ai, C. Emerson, P. Cochard and C. Soula (2006). "Ventral neural  
651 progenitors switch toward an oligodendroglial fate in response to increased Sonic hedgehog (Shh)  
652 activity: involvement of Sulfatase 1 in modulating Shh signaling in the ventral spinal cord." J Neurosci  
653 **26**(19): 5037-5048.
- 654 Danesin, C. and C. Soula (2017). "Moving the Shh Source over Time: What Impact on Neural Cell  
655 Diversification in the Developing Spinal Cord?" J Dev Biol **5**(2).
- 656 Dasen, J. S. (2017). "Master or servant? emerging roles for motor neuron subtypes in the construction  
657 and evolution of locomotor circuits." Curr Opin Neurobiol **42**: 25-32.
- 658 Dessaud, E., A. P. McMahon and J. Briscoe (2008). "Pattern formation in the vertebrate neural tube: a  
659 sonic hedgehog morphogen-regulated transcriptional network." Development **135**(15): 2489-2503.
- 660 Dessaud, E., V. Ribes, N. Balaskas, L. L. Yang, A. Pierani, A. Kicheva, B. G. Novitch, J. Briscoe and N. Sasai  
661 (2010). "Dynamic assignment and maintenance of positional identity in the ventral neural tube by the  
662 morphogen sonic hedgehog." PLoS Biol **8**(6): e1000382.
- 663 Dessaud, E., L. L. Yang, K. Hill, B. Cox, F. Ulloa, A. Ribeiro, A. Mynett, B. G. Novitch and J. Briscoe (2007).  
664 "Interpretation of the sonic hedgehog morphogen gradient by a temporal adaptation mechanism."  
665 Nature **450**(7170): 717-720.
- 666 Dimou, L. and M. Simons (2017). "Diversity of oligodendrocytes and their progenitors." Curr Opin  
667 Neurobiol **47**: 73-79.
- 668 Fu, H., Y. Qi, M. Tan, J. Cai, H. Takebayashi, M. Nakafuku, W. Richardson and M. Qiu (2002). "Dual origin  
669 of spinal oligodendrocyte progenitors and evidence for the cooperative role of Olig2 and Nkx2.2 in the  
670 control of oligodendrocyte differentiation." Development **129**(3): 681-693.
- 671 Gonzalez-Reyes, L. E., M. Verbitsky, J. Blesa, V. Jackson-Lewis, D. Paredes, K. Tillack, S. Phani, E. R.  
672 Kramer, S. Przedborski and A. H. Kottmann (2012). "Sonic hedgehog maintains cellular and  
673 neurochemical homeostasis in the adult nigrostriatal circuit." Neuron **75**(2): 306-319.
- 674 Gregor, T., W. Bialek, R. R. de Ruyter van Steveninck, D. W. Tank and E. F. Wieschaus (2005). "Diffusion  
675 and scaling during early embryonic pattern formation." Proc Natl Acad Sci U S A **102**(51): 18403-18407.
- 676 Hamaratoglu, F., A. M. de Lachapelle, G. Pyrowolakis, S. Bergmann and M. Affolter (2011). "Dpp  
677 signaling activity requires Pentagone to scale with tissue size in the growing *Drosophila* wing imaginal  
678 disc." PLoS Biol **9**(10): e1001182.
- 679 Houchmandzadeh, B., E. Wieschaus and S. Leibler (2005). "Precise domain specification in the  
680 developing *Drosophila* embryo." Phys Rev E Stat Nonlin Soft Matter Phys **72**(6 Pt 1): 061920.
- 681 Howard, M. and P. R. ten Wolde (2005). "Finding the center reliably: robust patterns of developmental  
682 gene expression." Phys Rev Lett **95**(20): 208103.
- 683 Huang, Y. and D. Umlis (2018). "Mechanisms and Measurements of Scale Invariance of Morphogen  
684 Gradients." Methods Mol Biol **1863**: 251-262.
- 685 Jessell, T. M. (2000). "Neuronal specification in the spinal cord: inductive signals and transcriptional  
686 codes." Nat Rev Genet **1**(1): 20-29.
- 687 Kicheva, A., T. Bollenbach, A. Ribeiro, H. P. Valle, R. Lovell-Badge, V. Episkopou and J. Briscoe (2014).  
688 "Coordination of progenitor specification and growth in mouse and chick spinal cord." Science  
689 **345**(6204): 1254927.
- 690 Kicheva, A. and J. Briscoe (2015). "Developmental Pattern Formation in Phases." Trends Cell Biol **25**(10):  
691 579-591.
- 692 Lander, A. D. (2007). "Morpheus unbound: reimagining the morphogen gradient." Cell **128**(2): 245-256.

693 McHale, P., W. J. Rappel and H. Levine (2006). "Embryonic pattern scaling achieved by oppositely  
694 directed morphogen gradients." *Phys Biol* **3**(2): 107-120.

695 Mizuguchi, R., M. Sugimori, H. Takebayashi, H. Kosako, M. Nagao, S. Yoshida, Y. Nabeshima, K.  
696 Shimamura and M. Nakafuku (2001). "Combinatorial roles of olig2 and neurogenin2 in the coordinated  
697 induction of pan-neuronal and subtype-specific properties of motoneurons." *Neuron* **31**(5): 757-771.

698 Novitch, B. G., A. I. Chen and T. M. Jessell (2001). "Coordinate regulation of motor neuron subtype  
699 identity and pan-neuronal properties by the bHLH repressor Olig2." *Neuron* **31**(5): 773-789.

700 Oppenheim, R. W., S. Homma, E. Marti, D. Prevet, S. Wang, H. Yaginuma and A. P. McMahon (1999).  
701 "Modulation of early but not later stages of programmed cell death in embryonic avian spinal cord by  
702 sonic hedgehog." *Mol Cell Neurosci* **13**(5): 348-361.

703 Osterstock, G., B. Le Bras, K. H. Arulkandarajah, H. Le Corronc, A. Czarnecki, C. Mouffle, E. Bullier, P.  
704 Legendre and J. M. Mangin (2018). "Axoglial synapses are formed onto pioneer oligodendrocyte  
705 precursor cells at the onset of spinal cord gliogenesis." *Glia*.

706 Park, H. C., J. Shin and B. Appel (2004). "Spatial and temporal regulation of ventral spinal cord precursor  
707 specification by Hedgehog signaling." *Development* **131**(23): 5959-5969.

708 Ravanelli, A. M. and B. Appel (2015). "Motor neurons and oligodendrocytes arise from distinct cell  
709 lineages by progenitor recruitment." *Genes Dev* **29**(23): 2504-2515.

710 Ravanelli, A. M., C. A. Kearns, R. K. Powers, Y. Wang, J. H. Hines, M. J. Donaldson and B. Appel (2018).  
711 "Sequential specification of oligodendrocyte lineage cells by distinct levels of Hedgehog and Notch  
712 signaling." *Dev Biol* **444**(2): 93-106.

713 Touahri, Y., N. Escalas, B. Benazeraf, P. Cochard, C. Danesin and C. Soula (2012). "Sulfatase 1 promotes  
714 the motor neuron-to-oligodendrocyte fate switch by activating Shh signaling in Olig2 progenitors of the  
715 embryonic ventral spinal cord." *J Neurosci* **32**(50): 18018-18034.

716 Traiffort, E., M. Zakaria, Y. Laouarem and J. Ferent (2016). "Hedgehog: A Key Signaling in the  
717 Development of the Oligodendrocyte Lineage." *J Dev Biol* **4**(3).

718 Umulis, D. M. and H. G. Othmer (2013). "Mechanisms of scaling in pattern formation." *Development*  
719 **140**(24): 4830-4843.

720 Uygur, A., J. Young, T. R. Huycke, M. Koska, J. Briscoe and C. J. Tabin (2016). "Scaling Pattern to  
721 Variations in Size during Development of the Vertebrate Neural Tube." *Dev Cell* **37**(2): 127-135.

722 Yu, K., S. McGlynn and M. P. Matise (2013). "Floor plate-derived sonic hedgehog regulates glial and  
723 ependymal cell fates in the developing spinal cord." *Development* **140**(7): 1594-1604.

724  
725  
726  
727  
728  
729  
730  
731  
732  
733  
734  
735  
736  
737  
738  
739



740

741

742

743 **Fig. 1. Shh expression and ablation strategy in the ventral spinal cord at E12.5.**

744

745

746

747 **Fig. 1. Shh expression and ablation strategy in the ventral spinal cord at E12.5.**

748

749 **(A)** X-gal staining of Shh expressing cells of E12.5 control Shh<sup>C/C</sup> spinal cord sections.  
750 Three sources identified: Medial floor plate (MFP), lateral floor plate (LFP), and motor  
751 neurons (MN).

752 **(B)** Numbers of nLacZ expressing cells in MFP (FoxA2+) n=6, LFP (FoxA2+ Nkx2.2-)  
753 n=5, LFP\* (Nkx2.2+) n=11, and among MNs (Hb9+) n=14. Ventricular zone derived  
754 (VDZ): LFP, LFP\*, and MNs. Breakdown percentages of each Shh source relative to  
755 total. Means ± SEM are shown.

756 **(C)** Overlap in MN and ventral OPC generation from pMN domain with the timing of Shh  
757 expression from all sources.

758 **(D)** Immunostaining for nLacZ and FoxA2 on brachial and thoracic segments.  
759 Identification of MFP (FoxA2+ nLacZ+) and LFP (FoxA2+ nLacZ+). LFP cells are  
760 identified as dorsal to MFP cells, oriented in tangent to MFP, and expressing lower  
761 levels of nLacZ.

762 **(E)** Immunostaining for nLacZ and Nkx2.2 on brachial and thoracic segments.  
763 Identification of LFP (Nkx2.2- nLacZ+) and LFP\* (Nkx2.2+ nLacZ+). Arrows point to  
764 migrating LFP\* Nkx2.2+ nLacZ+ cells.

765 **(F)** X-gal staining and immunostaining for nLacZ and Hb9 on brachial segments.

766 **(G)** Quantification of MFP nLacZ recombination at brachial and thoracic segments for  
767 each Shh source per genotype. Brachial and thoracic segments Shh<sup>C/C</sup> n=5, ChAT<sup>Shh<sup>-/-</sup></sup>  
768 n=3, Nestin<sup>Shh<sup>-/-</sup></sup> n=3, Olig2<sup>Shh<sup>-/-</sup></sup> n=5. Means ± SEM are shown. One-way ANOVA,  
769 Dunnett's multiple comparison post hoc test. \*p<0.05, \*\*p<0.01, \*\*\*p<0.001.

770 **(H)** Quantification of LFP and LFP\* nLacZ recombination at brachial and thoracic  
771 segments for each Shh source per genotype. Brachial and thoracic segments Shh<sup>C/C</sup>  
772 n=5, ChAT<sup>Shh<sup>-/-</sup></sup> n=4-5, Nestin<sup>Shh<sup>-/-</sup></sup> n=4, Olig2<sup>Shh<sup>-/-</sup></sup> n=3. Means ± SEM are shown. One-  
773 way ANOVA, Dunnett's multiple comparison post hoc test. \*p<0.05, \*\*p<0.01,  
774 \*\*\*p<0.001.

775 **(I)** Quantification of nLacZ recombination in brachial MNs. Shh<sup>C/C</sup> n=14, ChAT<sup>Shh<sup>-/-</sup></sup> n=8,  
776 Nestin<sup>Shh<sup>-/-</sup></sup> n=5, Olig2<sup>Shh<sup>-/-</sup></sup> n=5. Means ± SEM are shown. One-way ANOVA, Dunnett's  
777 multiple comparison post hoc test. \*p<0.05, \*\*p<0.01, \*\*\*p<0.001.

778 **(J)** Schematic of Shh expressing cells at E12.5 brachial and thoracic segments and  
779 strategy of Cre ablation for each genotype. Scale bars, 50 µm.

780

781

782



783

784 **Fig. 2. Early spinal cord patterning is unaffected in  $Olig2^{Shh^{-/-}}$ .**

785 (A) Detection of Cre activity in  $Olig2^{Shh^{-/-}}$  and  $Nestin^{Shh^{-/-}}$  mutants at E10.5 using the  
786 conditional R26mT/mG allele.

787 (B) GFP co-labeling of Cre activity in addition to a loss of nLacZ from Foxa2+ cells  
788 demonstrates Shh ablation in MFP of  $Olig2^{Shh^{-/-}}$  but not  $Nestin^{Shh^{-/-}}$  embryos. Arrows  
789 indicate MFP FoxA2+ cells that have lost nLacZ expression. NC, notochord.

790 (C) Quantification of recombination frequency of the ratio of Foxa2+ nLacZ+ double  
791 positive cells.  $Shh^{C/C}$  n=2,  $Nestin^{Shh^{-/-}}$  n=3,  $Olig2^{Shh^{-/-}}$  n=5. Means  $\pm$  SEM are shown.  
792 One-way ANOVA, Tukey post hoc test. \*p<0.05, \*\*p<0.01.

793 (D) Immunostaining of Shh-sensitive domains, Olig2, Nkx2.2, Dbx1, and Pax6 are  
794 unaffected at E10.5 in  $Olig2^{Shh^{-/-}}$ , despite MFP recombination.

795 (E) Quantification of relative domain sizes and numbers of Nkx2.2, Olig2, Dbx1. Domain  
796 measurement  $Shh^{C/C}$  n=4-6,  $Olig2^{Shh^{-/-}}$  n=4. Means  $\pm$  SEM are shown. Cell counts  
797  $Shh^{C/C}$  n=5-8,  $Olig2^{Shh^{-/-}}$  n=4-8. Data were analyzed by Student's t test. \*p<0.05,  
798 \*\*p<0.01.

799 (F) Scheme highlighting position of p3 (Nkx2.2), p0 (Dbx-1), and pMN (Olig2) domains  
800 relative to the MFP at E10.5.

801

802

803



805 **Fig. 3. Shh signaling from MFP, but not VZD influences MN generation.**

806 **(A)** E12.5 brachial sections immunostained with Hb9, Lhx3, and Lhx1 to distinguish  
807 MMC and LMCL columns, and Hb9 and Isl1/2 to distinguish LMCM and LMCL columns.  
808 **(B)** Quantification of total brachial MNs.  $Shh^{C/C}$  n=11,  $ChAT_{Shh^{-/-}}$  n=5,  $Nestin_{Shh^{-/-}}$  n=4,  
809  $Olig2_{Shh^{+/-}}$  n=3,  $Olig2_{Shh^{-/-}}$  n=5. Means  $\pm$  SEM are shown. One-way ANOVA, Dunnett's  
810 multiple comparison post hoc test. \*p<0.05, \*\*p<0.01, \*\*\*p<0.001.  
811 **(C)** Quantification of total numbers of MMC, LMCM, and LMCL MNs. Means  $\pm$  SEM are  
812 shown. One-way ANOVA, Dunnett's multiple comparison post hoc test. \*p<0.05,  
813 \*\*p<0.01, \*\*\*p<0.001.  
814 **(D)** Ratio of each motor column to total brachial MNs. Means  $\pm$  SEM are shown. One-  
815 way ANOVA, Dunnett's multiple comparison post hoc test. NS, not significant, P>0.5.  
816 **(E)** E12.5 thoracic sections immunostained with Hb9 and nNos to distinguish MMC and  
817 HMC from PGC column, and Hb9 and Isl1/2 to distinguish MMC and HMC columns.  
818 **(F)** Quantification of total thoracic MNs.  $Shh^{C/C}$  n=4-5,  $ChAT_{Shh^{-/-}}$  n=5,  $Nestin_{Shh^{-/-}}$  n=4,  
819  $Olig2_{Shh^{+/-}}$  n=4,  $Olig2_{Shh^{-/-}}$  n=5. Means  $\pm$  SEM are shown. One-way ANOVA, Dunnett's  
820 multiple comparison post hoc test. \*p<0.05, \*\*p<0.01, \*\*\*p<0.001.  
821 **(G)** Quantification of total numbers of MMC, HMC, and PGC MNs. Means  $\pm$  SEM are  
822 shown. One-way ANOVA, Dunnett's multiple comparison post hoc test. \*p<0.05,  
823 \*\*p<0.01, \*\*\*p<0.001.  
824 **(H)** Ratio of each column to total thoracic MNs. Means  $\pm$  SEM are shown. One-way  
825 ANOVA, Dunnett's multiple comparison post hoc test. NS, not significant, P>0.5.  
826 **(I)** Immunostaining and quantification of late born migrating Hb9+ MNs at E12.5 brachial  
827 and thoracic segments.  $Shh^{C/C}$  n=6-7,  $ChAT_{Shh^{-/-}}$  n=5,  $Nestin_{Shh^{-/-}}$  n=3-4,  $Olig2_{Shh^{+/-}}$  n=3-  
828 4,  $Olig2_{Shh^{-/-}}$  n=5. Means  $\pm$  SEM are shown. One-way ANOVA, Dunnett's multiple  
829 comparison post hoc test. \*\*\*p<0.001.  
830 **(J)** Immunostaining and quantification of Hb9+ Caspase3+ apoptotic MNs at E12.5  
831 brachial and thoracic segments.  $Shh^{C/C}$  n=3-6,  $Olig2_{Shh^{+/-}}$  n=3,  $Olig2_{Shh^{-/-}}$  n=4-5. Means  $\pm$   
832 SEM are shown. One-way ANOVA, Dunnett's multiple comparison post hoc test.  
833 \*\*p<0.01, \*\*\*p<0.001.  
834 **(K)** Schematic representing Shh ablation within the genotypes and associated numbers  
835 of average MNs for brachial and thoracic sections. Scale bars, 50  $\mu$ m.

836

837

838

839

840

841

842

843

844



845 **Fig. 4. Shh from VZD in addition to MFP is critical for pMN domain maintenance in**  
846 **a spinal level specific manner.**

847 (A) Immunostaining of nLacZ with Nkx2.2, Dbx-1, and Olig2 on E12.5 thoracic sections.

848 (B) Immunostaining for Olig2 in the pMN domain along the AP axis on brachial,  
849 thoracic, and lumbar sections for Shh<sup>C/C</sup>, ChAT<sup>Shh<sup>-/-</sup></sup>, Nestin<sup>Shh<sup>-/-</sup></sup>, Olig2-Cre, Olig2<sup>Shh<sup>+/-</sup></sup>,  
850 and Olig2<sup>Shh<sup>-/-</sup></sup>.

851 (C) Quantification of numbers of Olig2 cells in the pMN domain for brachial, thoracic,  
852 and lumbar sections. Means  $\pm$  SEM are shown. Shh<sup>C/C</sup> n=12, Olig2-Cre n=2, ChAT<sup>Shh<sup>-/-</sup></sup>  
853 n=6, Olig2<sup>Shh<sup>+/-</sup></sup> n=5, Nestin<sup>Shh<sup>-/-</sup></sup> n=4, Olig2<sup>Shh<sup>-/-</sup></sup> n=8. One-way ANOVA, Dunnett's or  
854 Tukey's multiple comparison post hoc test. \*p<0.05, \*\*p<0.01, \*\*\*p<0.001.

855 (D) Expansion of pMN domain at onset of gliogenesis at brachial segments between  
856 E12.25-E12.75 is reduced in ChAT<sup>Shh<sup>-/-</sup></sup>.

857 (E) Quantification of Olig2 cells in the pMN domain on brachial segments. Means  $\pm$   
858 SEM are shown. E12.25 Shh<sup>C/C</sup> n=3, ChAT<sup>Shh<sup>-/-</sup></sup> n=3, E12.50 Shh<sup>C/C</sup> n=3, ChAT<sup>Shh<sup>-/-</sup></sup> n=3,  
859 E12.75 Shh<sup>C/C</sup> n=3, ChAT<sup>Shh<sup>-/-</sup></sup> n=3. Data were analyzed by Student's t test. \*p<0.05.

860 (F) Schematic representing Shh ablation within the genotypes and associated numbers  
861 of average pMN Olig2 cells for brachial and thoracic sections. Blue columns indicate  
862 percent of Shh expressing cells normalized to Shh<sup>C/C</sup> controls for MFP, LFP, and MNs.  
863 Grey areas indicate Cre ablation. Red bars indicate average numbers of Olig2 cells  
864 within the pMN. Scale bars, 50  $\mu$ m.

865

866

867

868

869

870

871

872

873

874

875



876

877 **Fig. 5. pMN<sub>Olig2+</sub> expression and p\* domain formation requires Shh from MFP and**  
878 **VZD during onset of gliogenesis.**

879 (A) E12.5 Lineage tracing reveals correct establishment of the pMN in Olig2<sup>Shh<sup>-/-</sup></sup> as  
880 indicated by dorsal boundary of R26<sup>mT/mG</sup> expression, however failure of maintenance  
881 of Olig2 in pMN as detected by immunolabeling. Scale bars, 50  $\mu$ m.

882 (B) p\* domain is found in contact with LFP\* in Shh<sup>C/C</sup> controls but not in Nestin<sup>Shh<sup>-/-</sup></sup> and  
883 Olig2<sup>Shh<sup>-/-</sup></sup> as identified by immunolabeling of Olig2<sup>+</sup> Nkx2.2 (p\*) and nLacZ<sup>+</sup> Nkx2.2<sup>+</sup>  
884 (LFP\*).

885 (C) Quantification of p\* domain in Shh<sup>C/C</sup>, Nestin<sup>Shh<sup>-/-</sup></sup>, and Olig2<sup>Shh<sup>-/-</sup></sup>. Means  $\pm$  SEM are  
886 shown. Shh<sup>C/C</sup> n=6, Nestin<sup>Shh<sup>-/-</sup></sup> n=6, Olig2<sup>Shh<sup>-/-</sup></sup> n=3. One-way ANOVA, Dunnett's  
887 multiple comparison post hoc test. \*\*p<0.01.

888

889

890

891

892

893

894

895

896



897

898 **Fig. 6. Exhaustion of pMNOlig2+ cells results in diminished OPC production.**

899

900 (A) pMN domain proliferation in lumbar sections labeled by EdU incorporation in 24hr  
 901 intervals for E12.5- E14.5 in *Shh<sup>C/C</sup>* and *Olig2<sup>Shh<sup>-/-</sup></sup>*.

902 (B) Total Olig2 cells in pMN at E12.5-E14.5. Means ± SEM are shown. *Shh<sup>C/C</sup>* n=3-4,  
 903 *Olig2<sup>Shh<sup>-/-</sup></sup>* n=3-4. Data were analyzed by Student's t test. \*p<0.05, \*\*p<0.01.

904 (C) Proliferation rate of Olig2 cells in pMN E12.5, E13.5, and E14.5. Means ± SEM are  
 905 shown. *Shh<sup>C/C</sup>* n=3-4, *Olig2<sup>Shh<sup>-/-</sup></sup>* n=3-4. Data were analyzed by Student's t test.

906 (D) Tracing of migrating Olig2 cells on representative lumbar sections with proliferation  
 907 labeled by EdU incorporation in 24hr intervals between E12.5- E14.5. Box indicates  
 908 pMN domain, Olig2+ cells in the mantle zone (red), Olig2+ EdU+ cells (green).

909 (E) Total Olig2 cells in mantle zone at E12.5, E13.5, and E14.5. Olig2 cell numbers in  
 910 *Olig2<sup>Shh<sup>-/-</sup></sup>* mantle remain reduced. Means ± SEM are shown. *Shh<sup>C/C</sup>* n=3-4, *Olig2<sup>Shh<sup>-/-</sup></sup>*  
 911 n=3-4. Data were analyzed by Student's t test. \*p<0.05.

912 (F) Proliferation rate of Olig2 cells in mantle zone at E12.5, E13.5, and E14.5. Olig2  
 913 cells that have migrated out of the pMN in *Olig2<sup>Shh<sup>-/-</sup></sup>* mutants proliferate at the same rate  
 914 as controls. Means ± SEM are shown. *Shh<sup>C/C</sup>* n=3-4, *Olig2<sup>Shh<sup>-/-</sup></sup>* n=3-4.  
 915



916

917

918 **Fig. S1. Shh expression in MNS.**

919 **(A)** Shh expression by MNS along AP axis at E14.5. Immunostaining colocalization of  
 920 nLacZ with MN markers Isl1/2 and ChAT. Revealing that thoracic MNS express Shh  
 921 much later than brachial and lumbar.

922 **(B)** X-gal staining revealing Shh expression pattern throughout AP axis of P20 control  
 923 Shh<sup>C/C</sup> spinal cords at brachial, thoracic, lumbar, and sacral segments.

924 **(C)** In situ hybridization for Shh in developing chick neural tube demonstrating  
 925 comparable timing and pattern of Shh expression by MNS as in mouse.

926 **(D and E)** Timeline of Shh expression by MNS in **(D)** mouse and **(E)** chick.

927



928  
929

930 **Fig. S2. Ablation of Shh from MFP and VZD sources**

931 **(A and B)** X-gal staining revealing ablation of Shh at lumbar spinal cord at **(A)** E13.5,  
932 and **(B)** E14.5. Arrows in B point to a dorsal Shh source located near the ventricular  
933 zone appearing at E14.5.

934 **(C)** X-gal staining of P20 spinal cords revealing loss of Shh expression from MNs and  
935 V0 cholinergic interneurons in ChAT<sup>Shh<sup>-/-</sup></sup>, MNs and descendants of neurons ventral to  
936 the Olig2 domain in Olig2<sup>Shh<sup>-/-</sup></sup>, and all neuronal sources in Nestin<sup>Shh<sup>-/-</sup></sup>.

937



938

939

940 **Fig. S3. AnkG staining at E10.5 and E12.5 revealing correct MN axon fasciculation**  
941 **and exit from ventral horns in Olig2<sup>Shh-/-</sup>.**

942

943

944

945

946

947

948

949

950

951

952



953

954

955 **Fig. S4. Immunostaining of Olig2 and DAPI on brachial and thoracic segments**  
956 **reveals the continued depletion of Olig2 cells from the pMN of Nestin<sup>Shh-/-</sup> but not**  
957 **ChAT<sup>Shh-/-</sup> at E14.5.**

958

959

960

961



962

963

964 **Fig. S5. Analysis of migrating Olig2 cell dispersion in Olig2<sup>Shh<sup>-/-</sup></sup> mutant and**  
965 **control embryos.**

966 Lumbar spinal cord sections from E12.5-E14.5 were binned into 6 zones excluding the  
967 ventricular zone, and numbers of Olig2 cells in each zone were quantified. Means ±  
968 SEM are shown. Shh<sup>C/C</sup> (n = 3-4 embryos), Olig2<sup>Shh<sup>-/-</sup></sup> (n = 3 embryos).

969

970

971

972

973

974

975

976

977

978



979

980 **Fig. S6. OPCs are reduced and do not increase proliferation rate.**

981 (A-D) Immunostaining on E14.5 sections for Olig2, EdU, and DAPI at (A and B) lumbar  
 982 and (C and D) posterior thoracic. Arrows indicate co-expression of Olig2 and EdU.

983 (E) Schematic depicting areas analyzed.

984 (F and G) 24hr pulse chase with a single EdU injection to label proliferating Olig2 cells.  
 985 Total Olig2 cells and Olig2+ EdU+ double positive cells are reduced in the pMN, mantle  
 986 zone, and white matter at both (F) lumbar and (G) posterior thoracic segments in  
 987  $Olig2^{Shh^{-/-}}$  compared to control.  $Shh^{C/C}$  (n = 3 embryos),  $Olig2^{Shh^{-/-}}$  (n = 3 embryos).

988 Means  $\pm$  SEM are shown. Data were analyzed by Student's t test. \* $p < 0.05$ , \*\* $p < 0.01$ .  
 989 Scale bars, 50  $\mu$ m.

990

991
